# Supplementary material
Source: PubMed Central journal article supplement (PMC7960267)
Supplement: 15-01173.pdf [file 15-01173.pdf]

**On-line Table 1: Outlier CL and WML analysis for each subgroup of patients with RRMS<sup>a</sup>**

|                           | RRMS-NI            |                     |                       |                  | RRMS-I             |                     |                         |                     |
|---------------------------|--------------------|---------------------|-----------------------|------------------|--------------------|---------------------|-------------------------|---------------------|
|                           | Standard Lesions   |                     | Outliers              |                  | Standard Lesions   |                     | Outliers                |                     |
|                           | WML                | CL                  | WML                   | CL               | WML                | CL                  | WML                     | CL                  |
| CBF<br>(mL/100 g per min) | 14.2<br>(9.6–19.5) | 21.0<br>(14.3–30.3) | 46.2<br>(39.0–57.2)   | 78.8             | 12.1<br>(8.0–17.7) | 22.5<br>(15.3–31.0) | 44.5<br>(38.0–60.6)     | 64.2<br>(63.9–64.5) |
| CBV<br>(mL/100 g)         | 1.1<br>(0.8–1.5)   | 1.3<br>(1.1–1.9)    | 3.1<br>(2.8–3.6)      | 4.6              | 1.0<br>(0.7–1.4)   | 1.6<br>(1.2–2.3)    | 3.3<br>(2.9–3.8)        | 5.2                 |
| MTT<br>(min)              | 4.8<br>(4.1–5.9)   | 4.3<br>(3.5–4.8)    | 0.9<br>(–23.6 to 8.7) | 8.2<br>(7.8–8.5) | 5.1<br>(4.3–6.0)   | 4.6<br>(3.9–5.4)    | –1.3<br>(–269.5 to 1.0) | NA                  |

**Note:**—NA indicates not applicable.

<sup>a</sup> All values are medians, and IQRs are in parentheses. Cortical lesions and white matter lesions have been divided into standard lesions (lesions that are not outliers) and outliers.

**On-line Table 2: Dispersion of WMLs and CLs for each subgroup of patients with RRMS<sup>a</sup>**

|     | RRMS-NI |     | RRMS-I |     |
|-----|---------|-----|--------|-----|
|     | CL      | WML | CL     | WML |
| CBF | 3.6     | 4.8 | 3.9    | 4.8 |
| CBV | 3.4     | 5.1 | 4.1    | 5.6 |
| MTT | 3.5     | 5.2 | 3.9    | 5.5 |

<sup>a</sup> CBF is in milliliters/100 g per minute; CBV is in milliliters/100 g.
